# Supplementary material for: Mitochondrial Transplantation promotes protective effector and memory CD4+ T cell response during Mycobacterium tuberculosis infection and diminishes exhaustion and senescence in elderly CD4+ T cells
Source: PubMed Central journal article supplement (PMC10849707; doi:10.1101/2024.01.24.577036), 2024-01-27
Supplement: NIHPP2024.01.24.577036v1-supplement-2.pdf [file NIHPP2024.01.24.577036v1-supplement-2.pdf]

○ Elderly CD4<sup>+</sup> T Cells (E-CD4<sup>+</sup> T Cells)

● Elderly CD4<sup>+</sup> T Cells + Mito-Transfer (EM-CD4<sup>+</sup> T Cells)

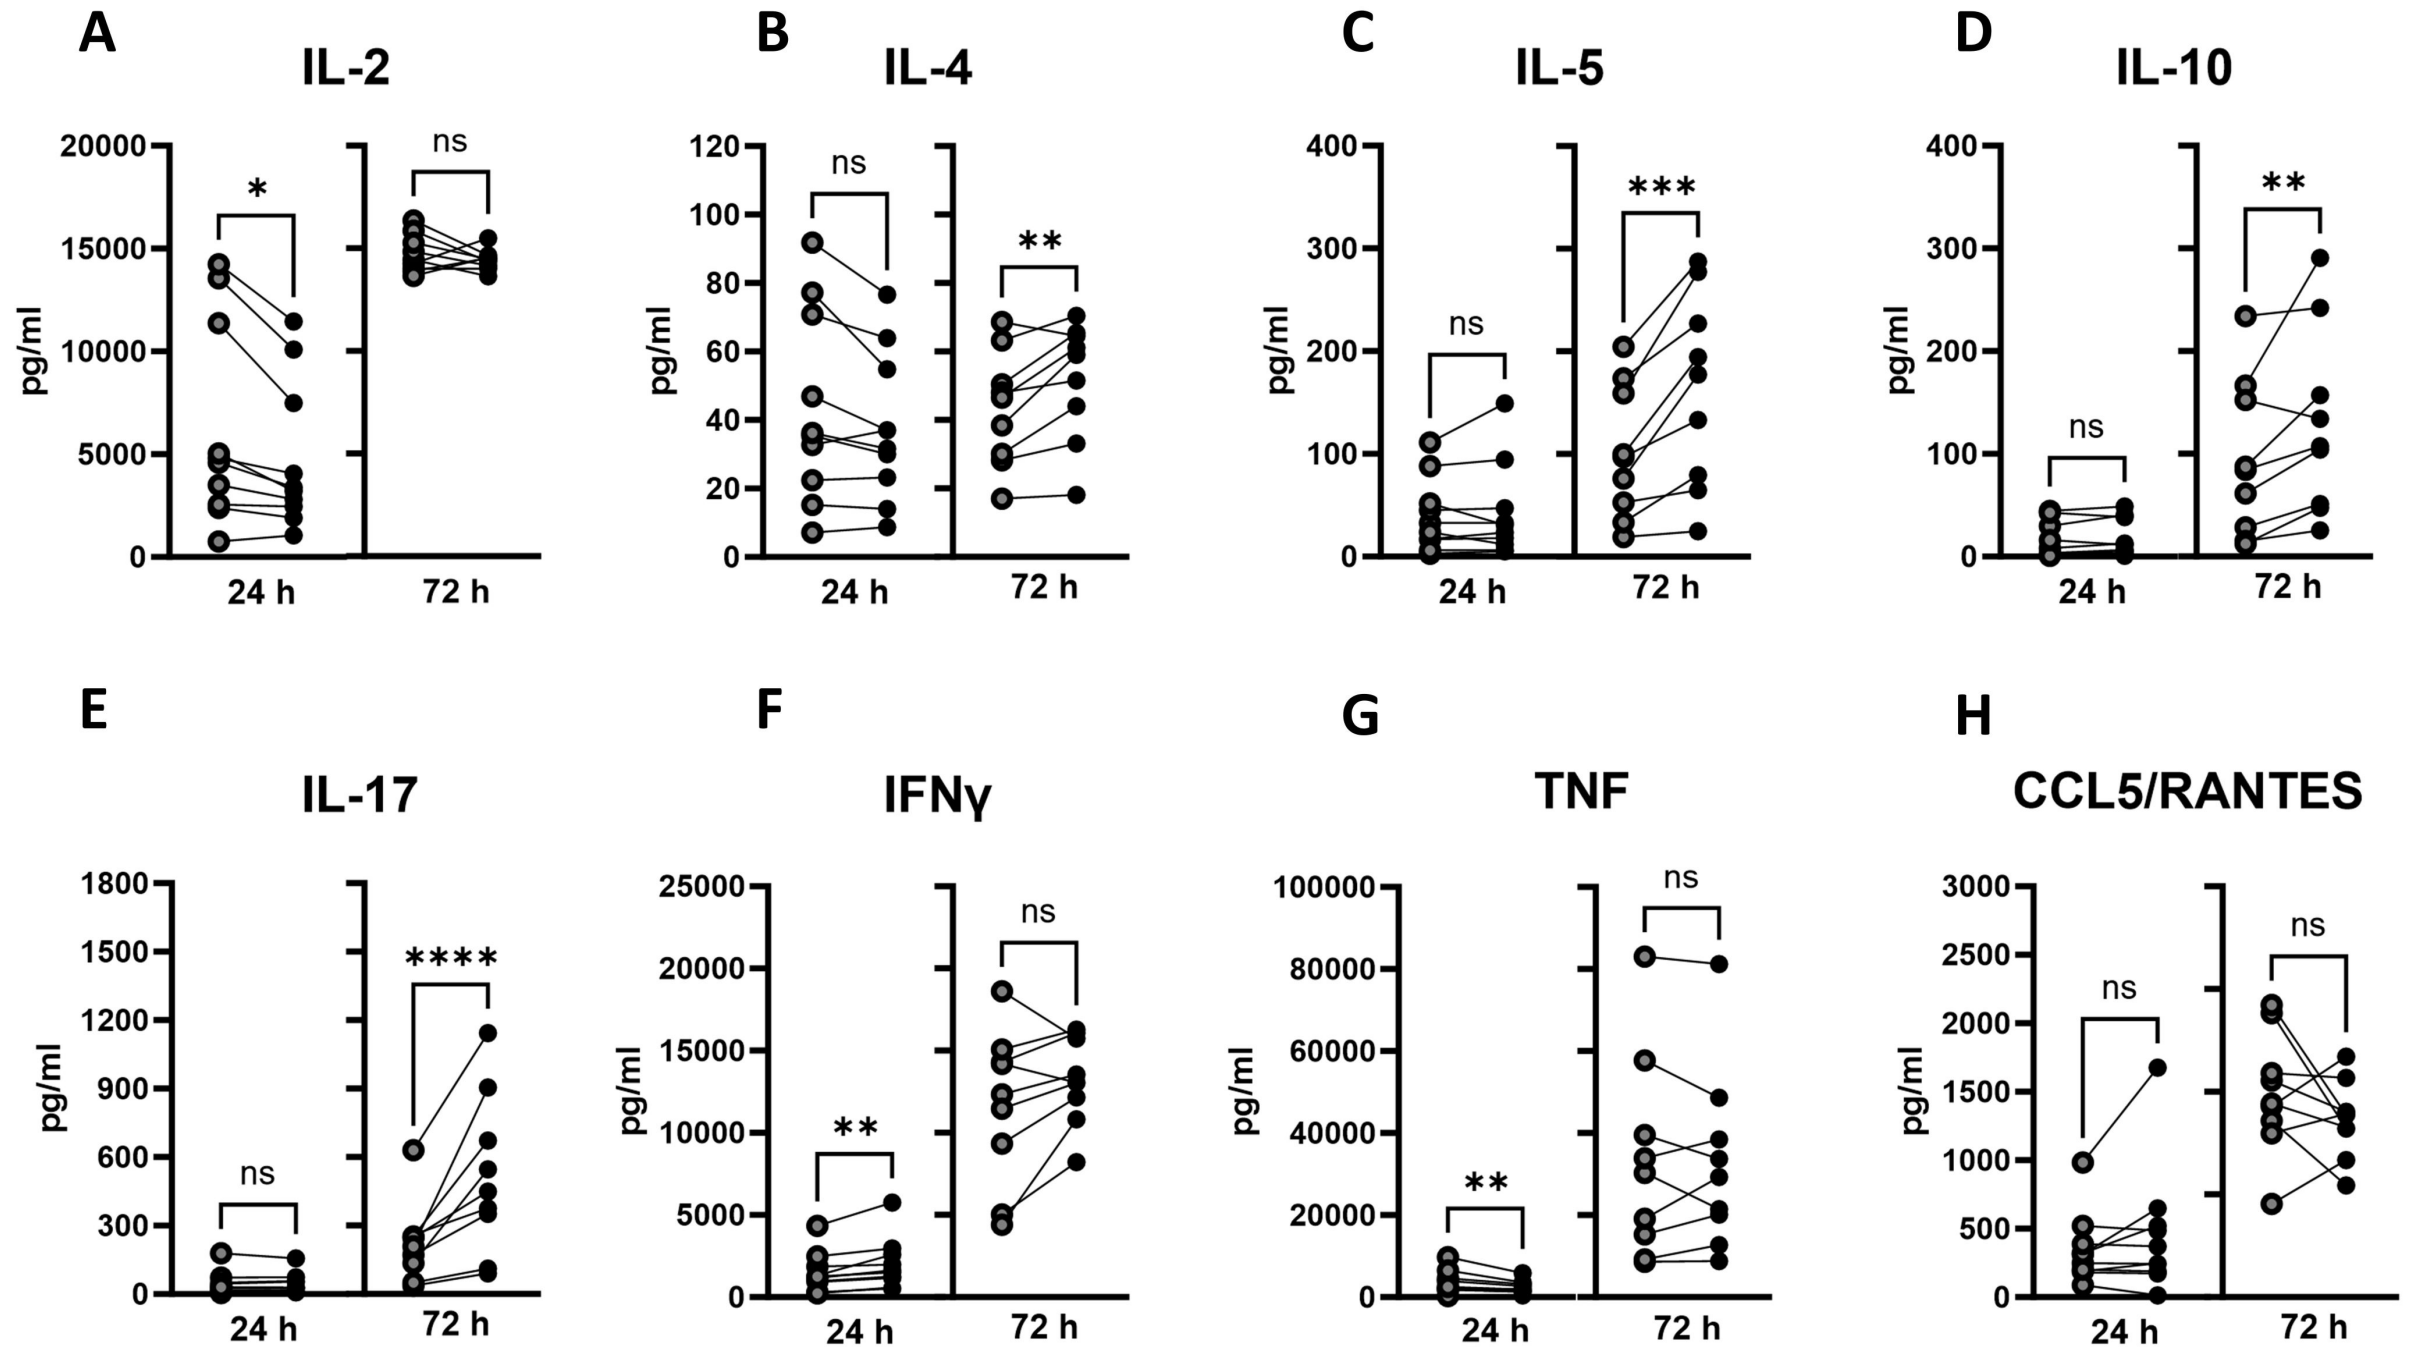

**Supp. Fig. 1. Mito-transfer alters cytokine production of CD4+ T cells in aged humans.**

CD4+ T cells from aged humans with or without mito-transfer were stimulated with PMA/Ionomycin. After 24h and 72h stimulation with PMA/Ionomycin, the supernatants were examined by Luminex array for cytokines produced. 9-10 biological replicates per group with  $p \leq 0.05 = *$ ,  $p \leq 0.01 = **$ , or  $p \leq 0.001 = ***$  using paired Student's *t*-test.

○ Elderly CD4<sup>+</sup> T Cells (E-CD4<sup>+</sup> T Cells)

● Elderly CD4<sup>+</sup> T Cells + Mito-Transfer (EM-CD4<sup>+</sup> T Cells)

### Single Stim.

**A**

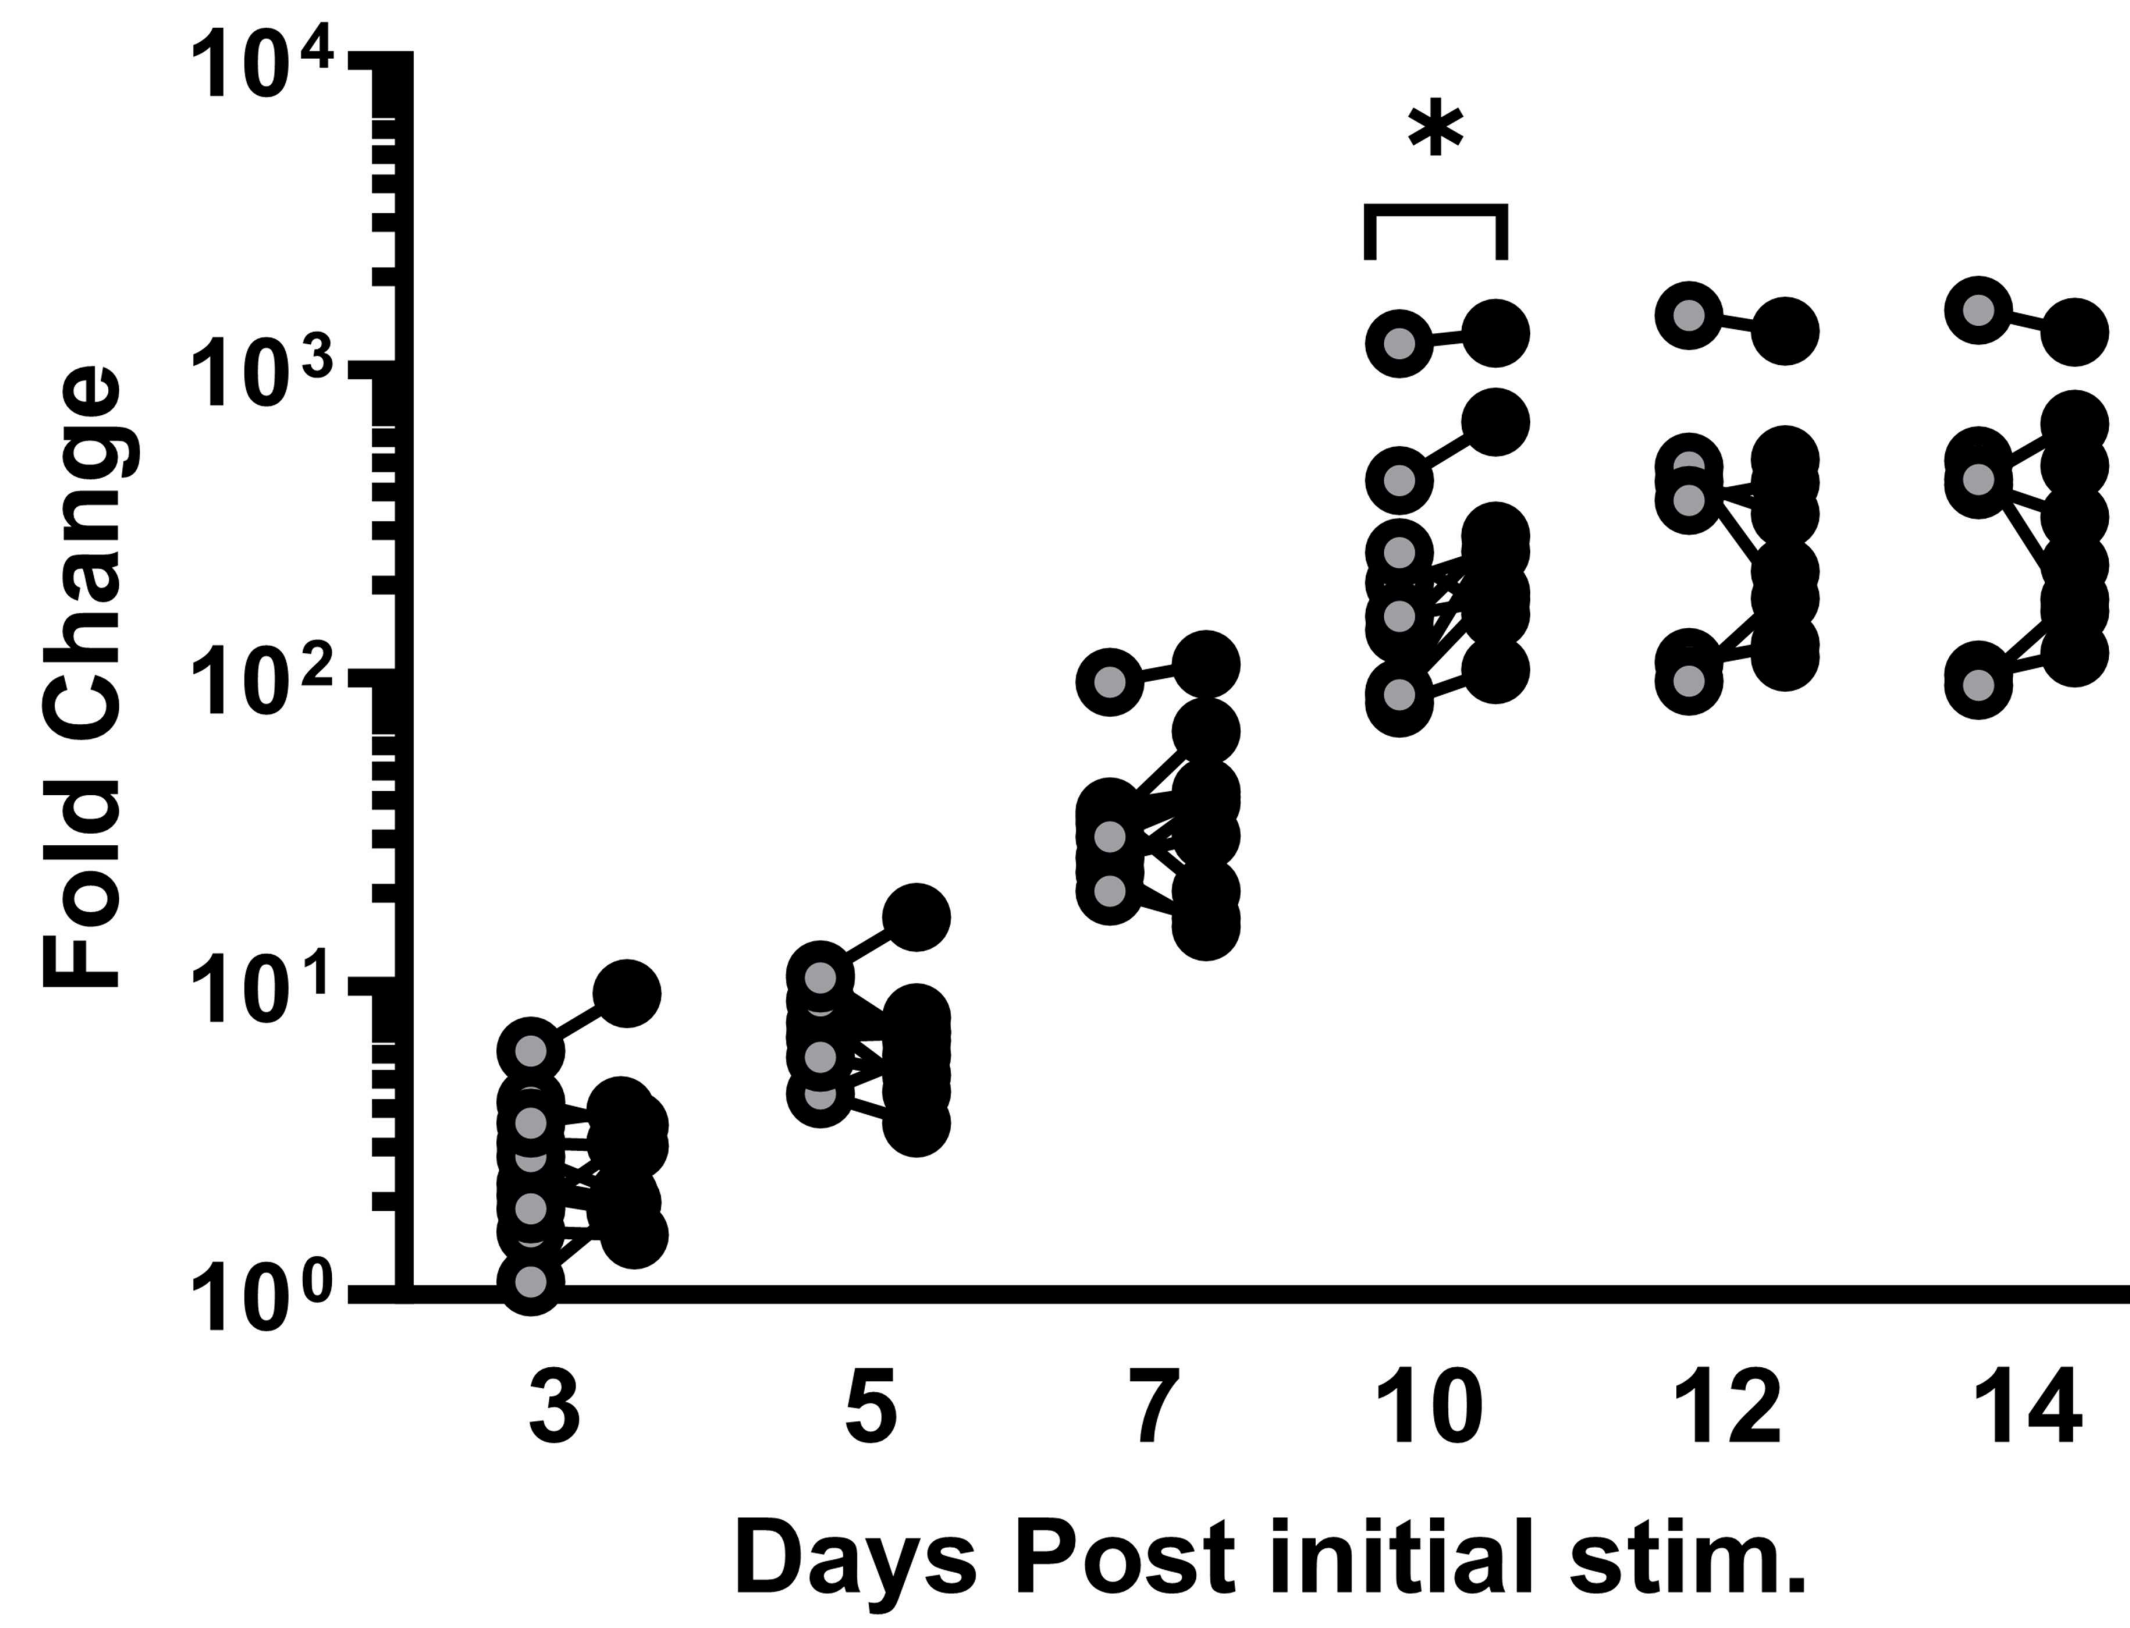

**B**

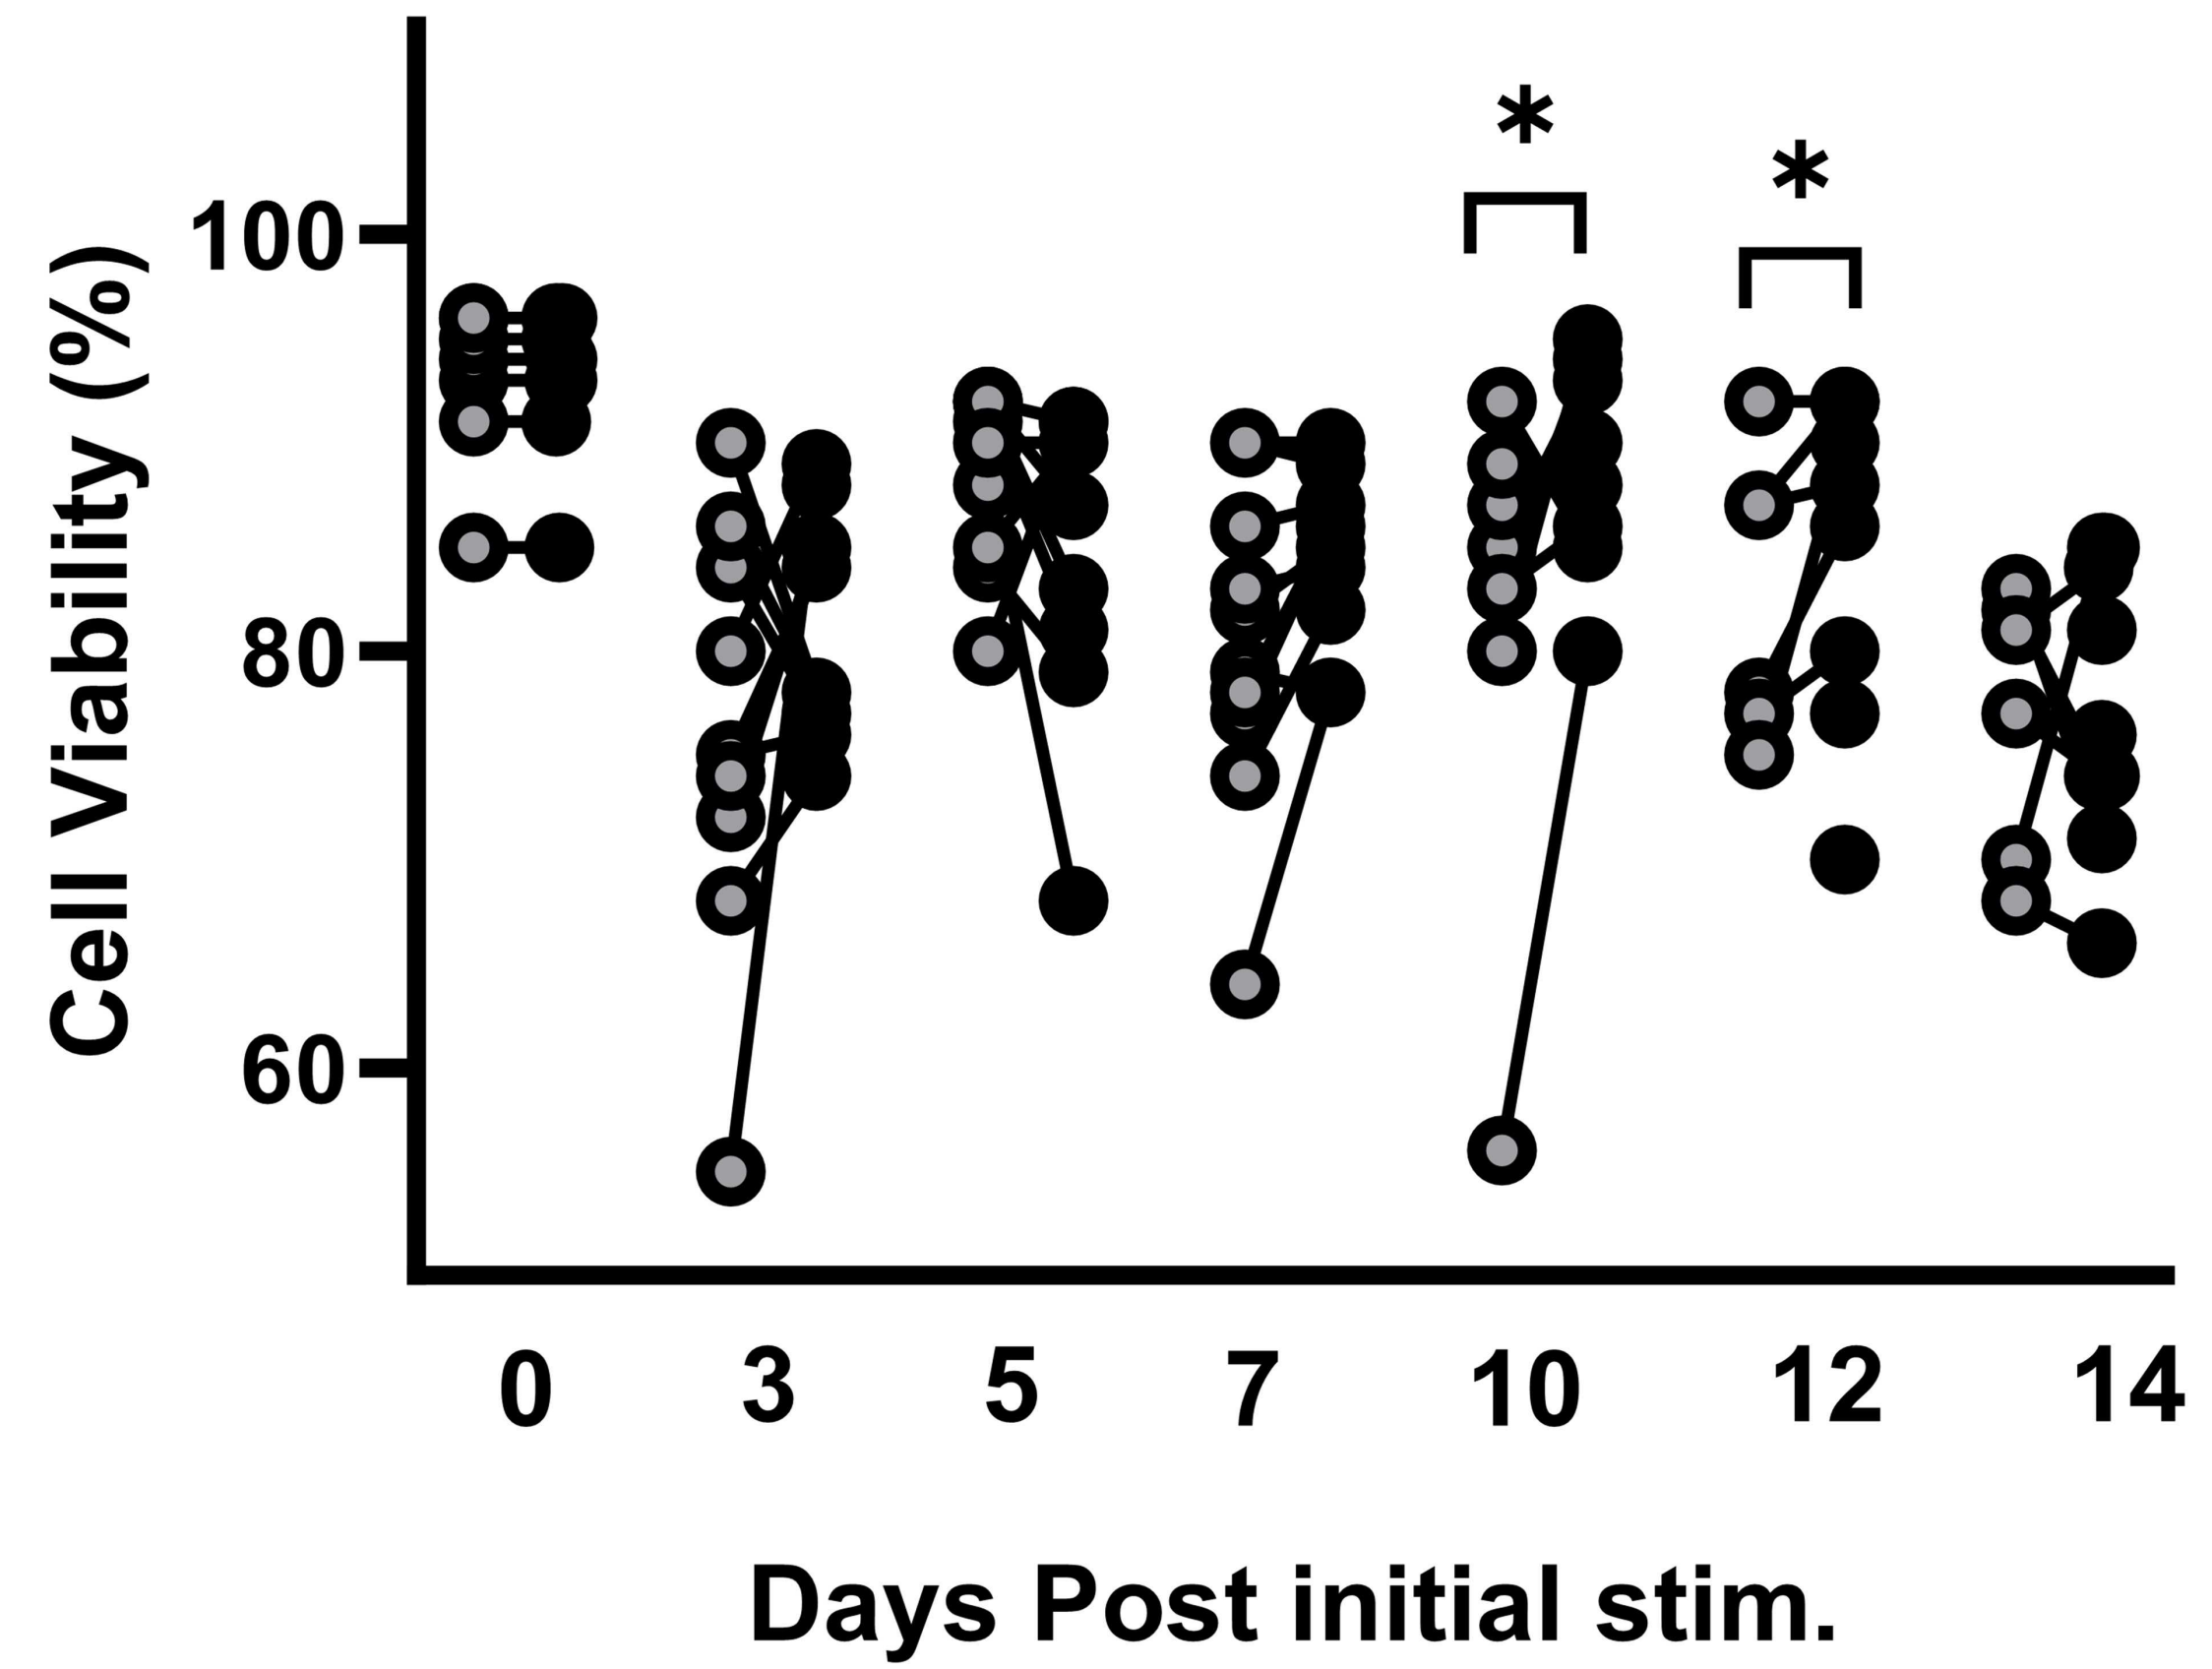

### Cont. Stim.

bioRxiv preprint doi: <https://doi.org/10.1101/2024.01.24.577036>; this version posted January 27, 2024. The copyright holder for this preprint (which was not certified by peer review) is the author/funder, who has granted bioRxiv a license to display the preprint in perpetuity. It is made available under aCC-BY-ND 4.0 International license.

**C**

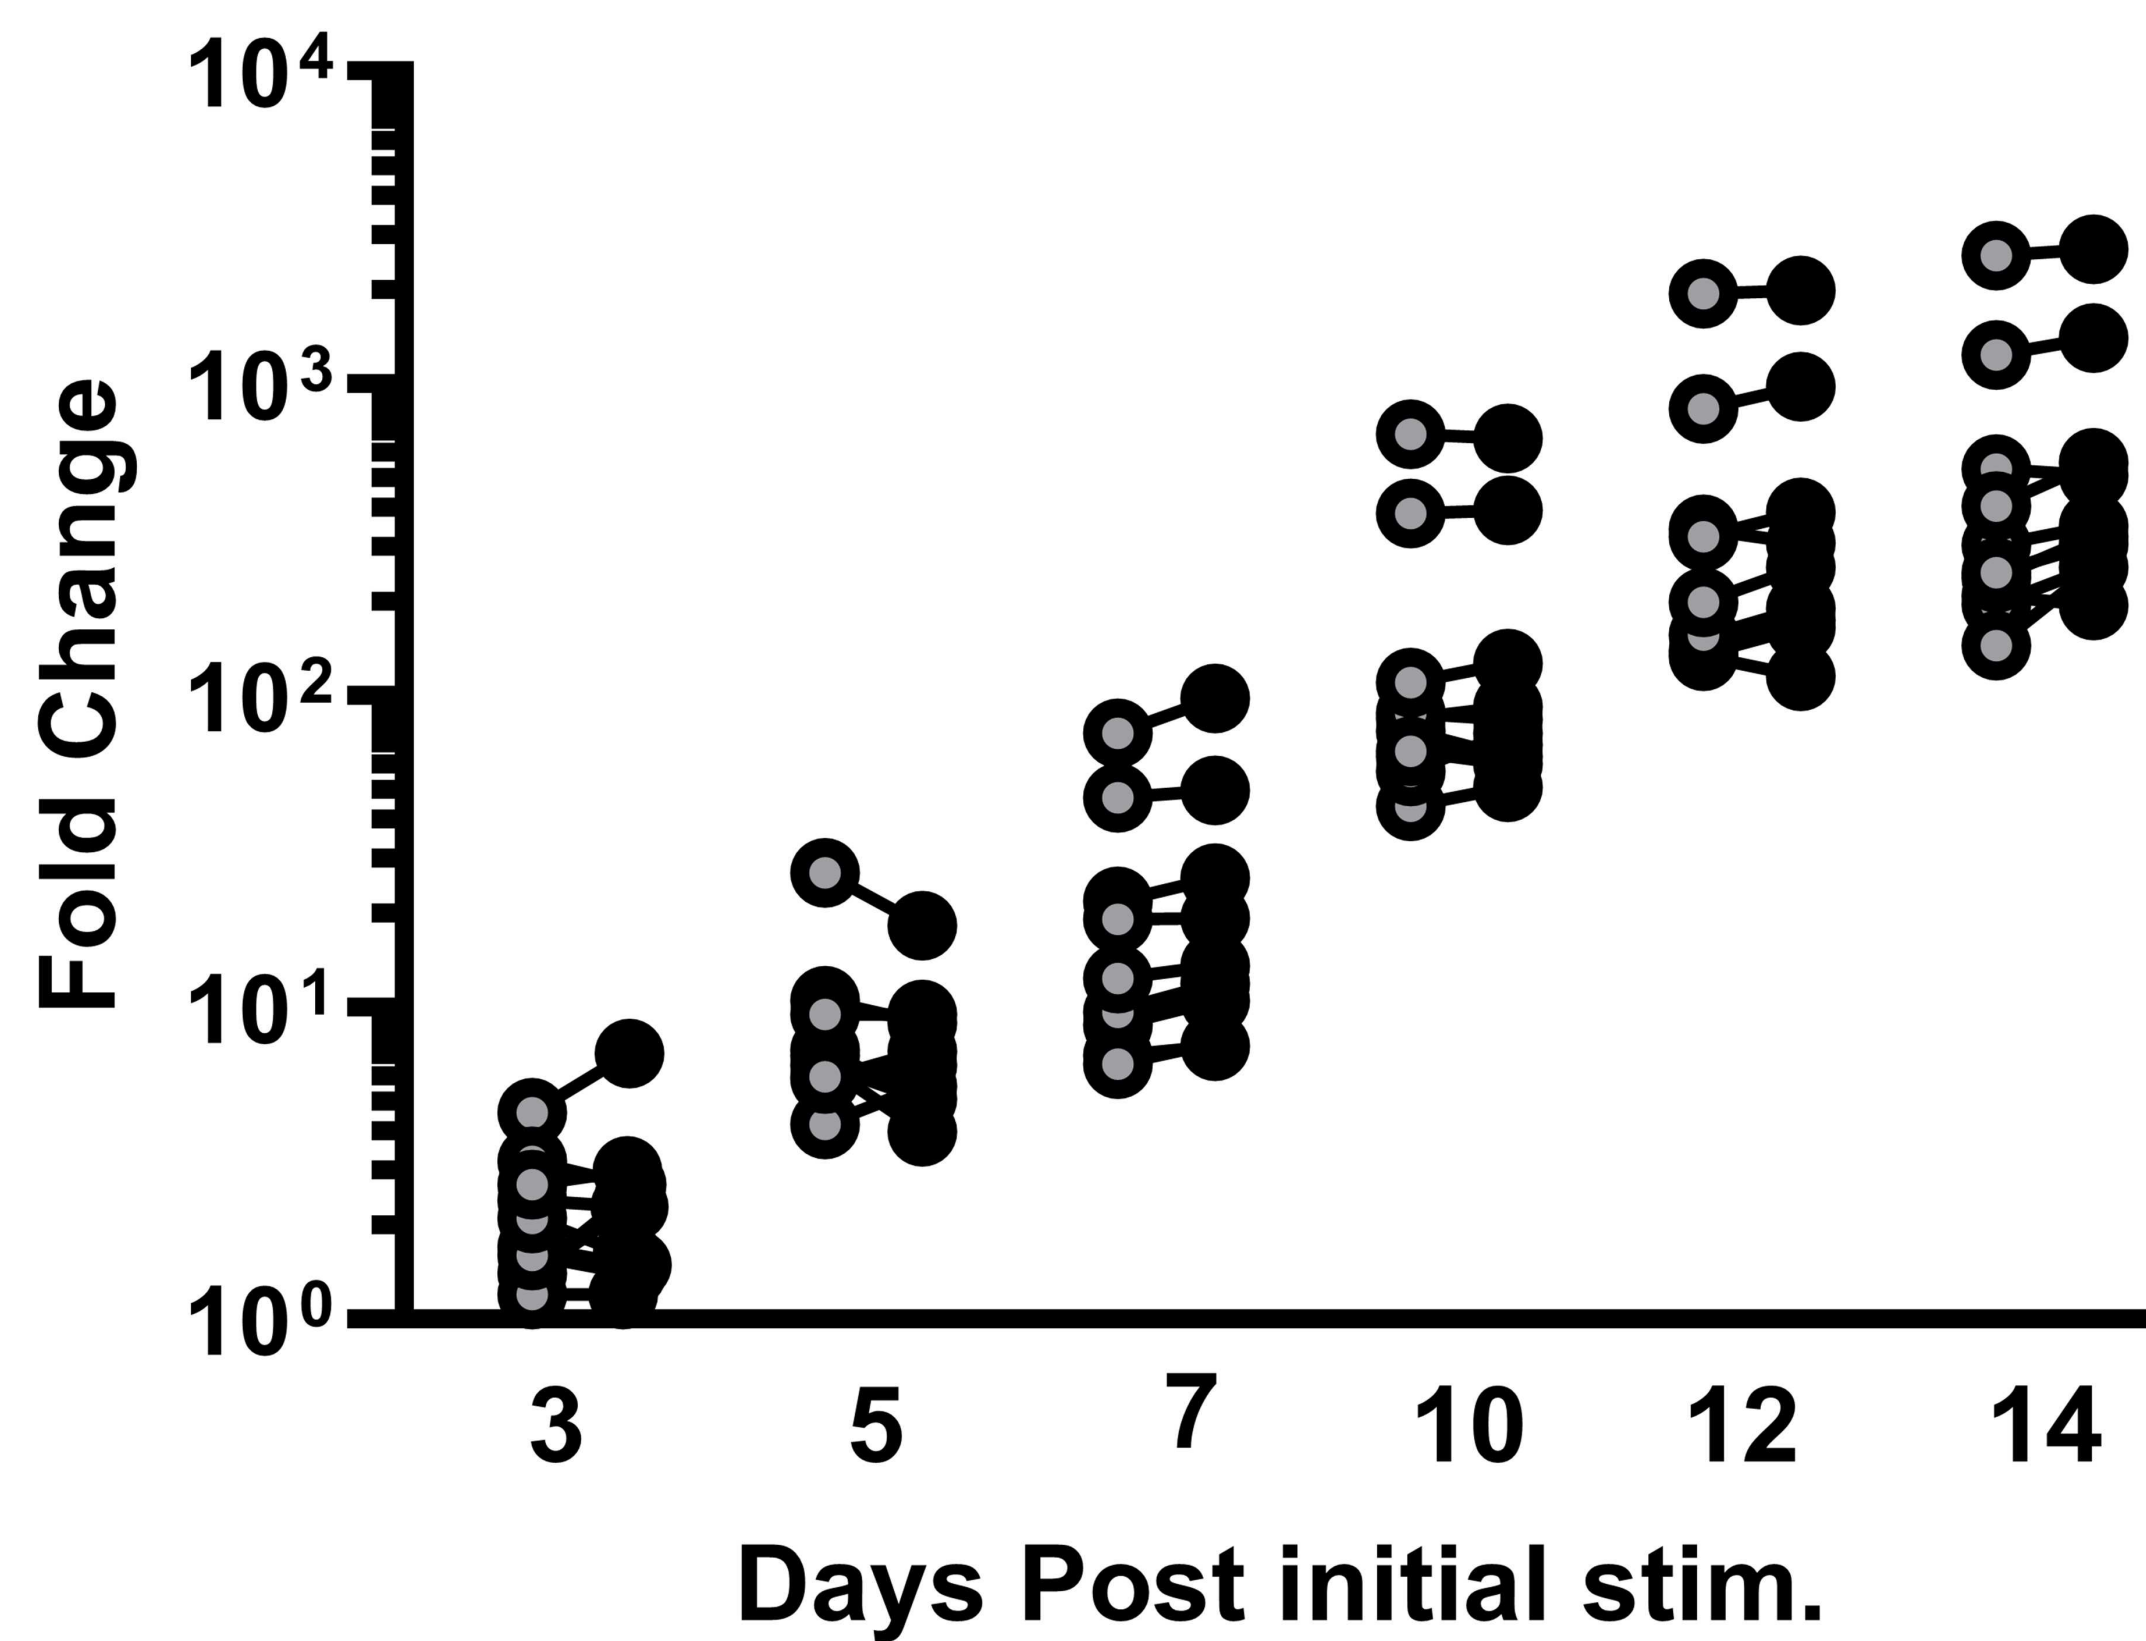

**D**

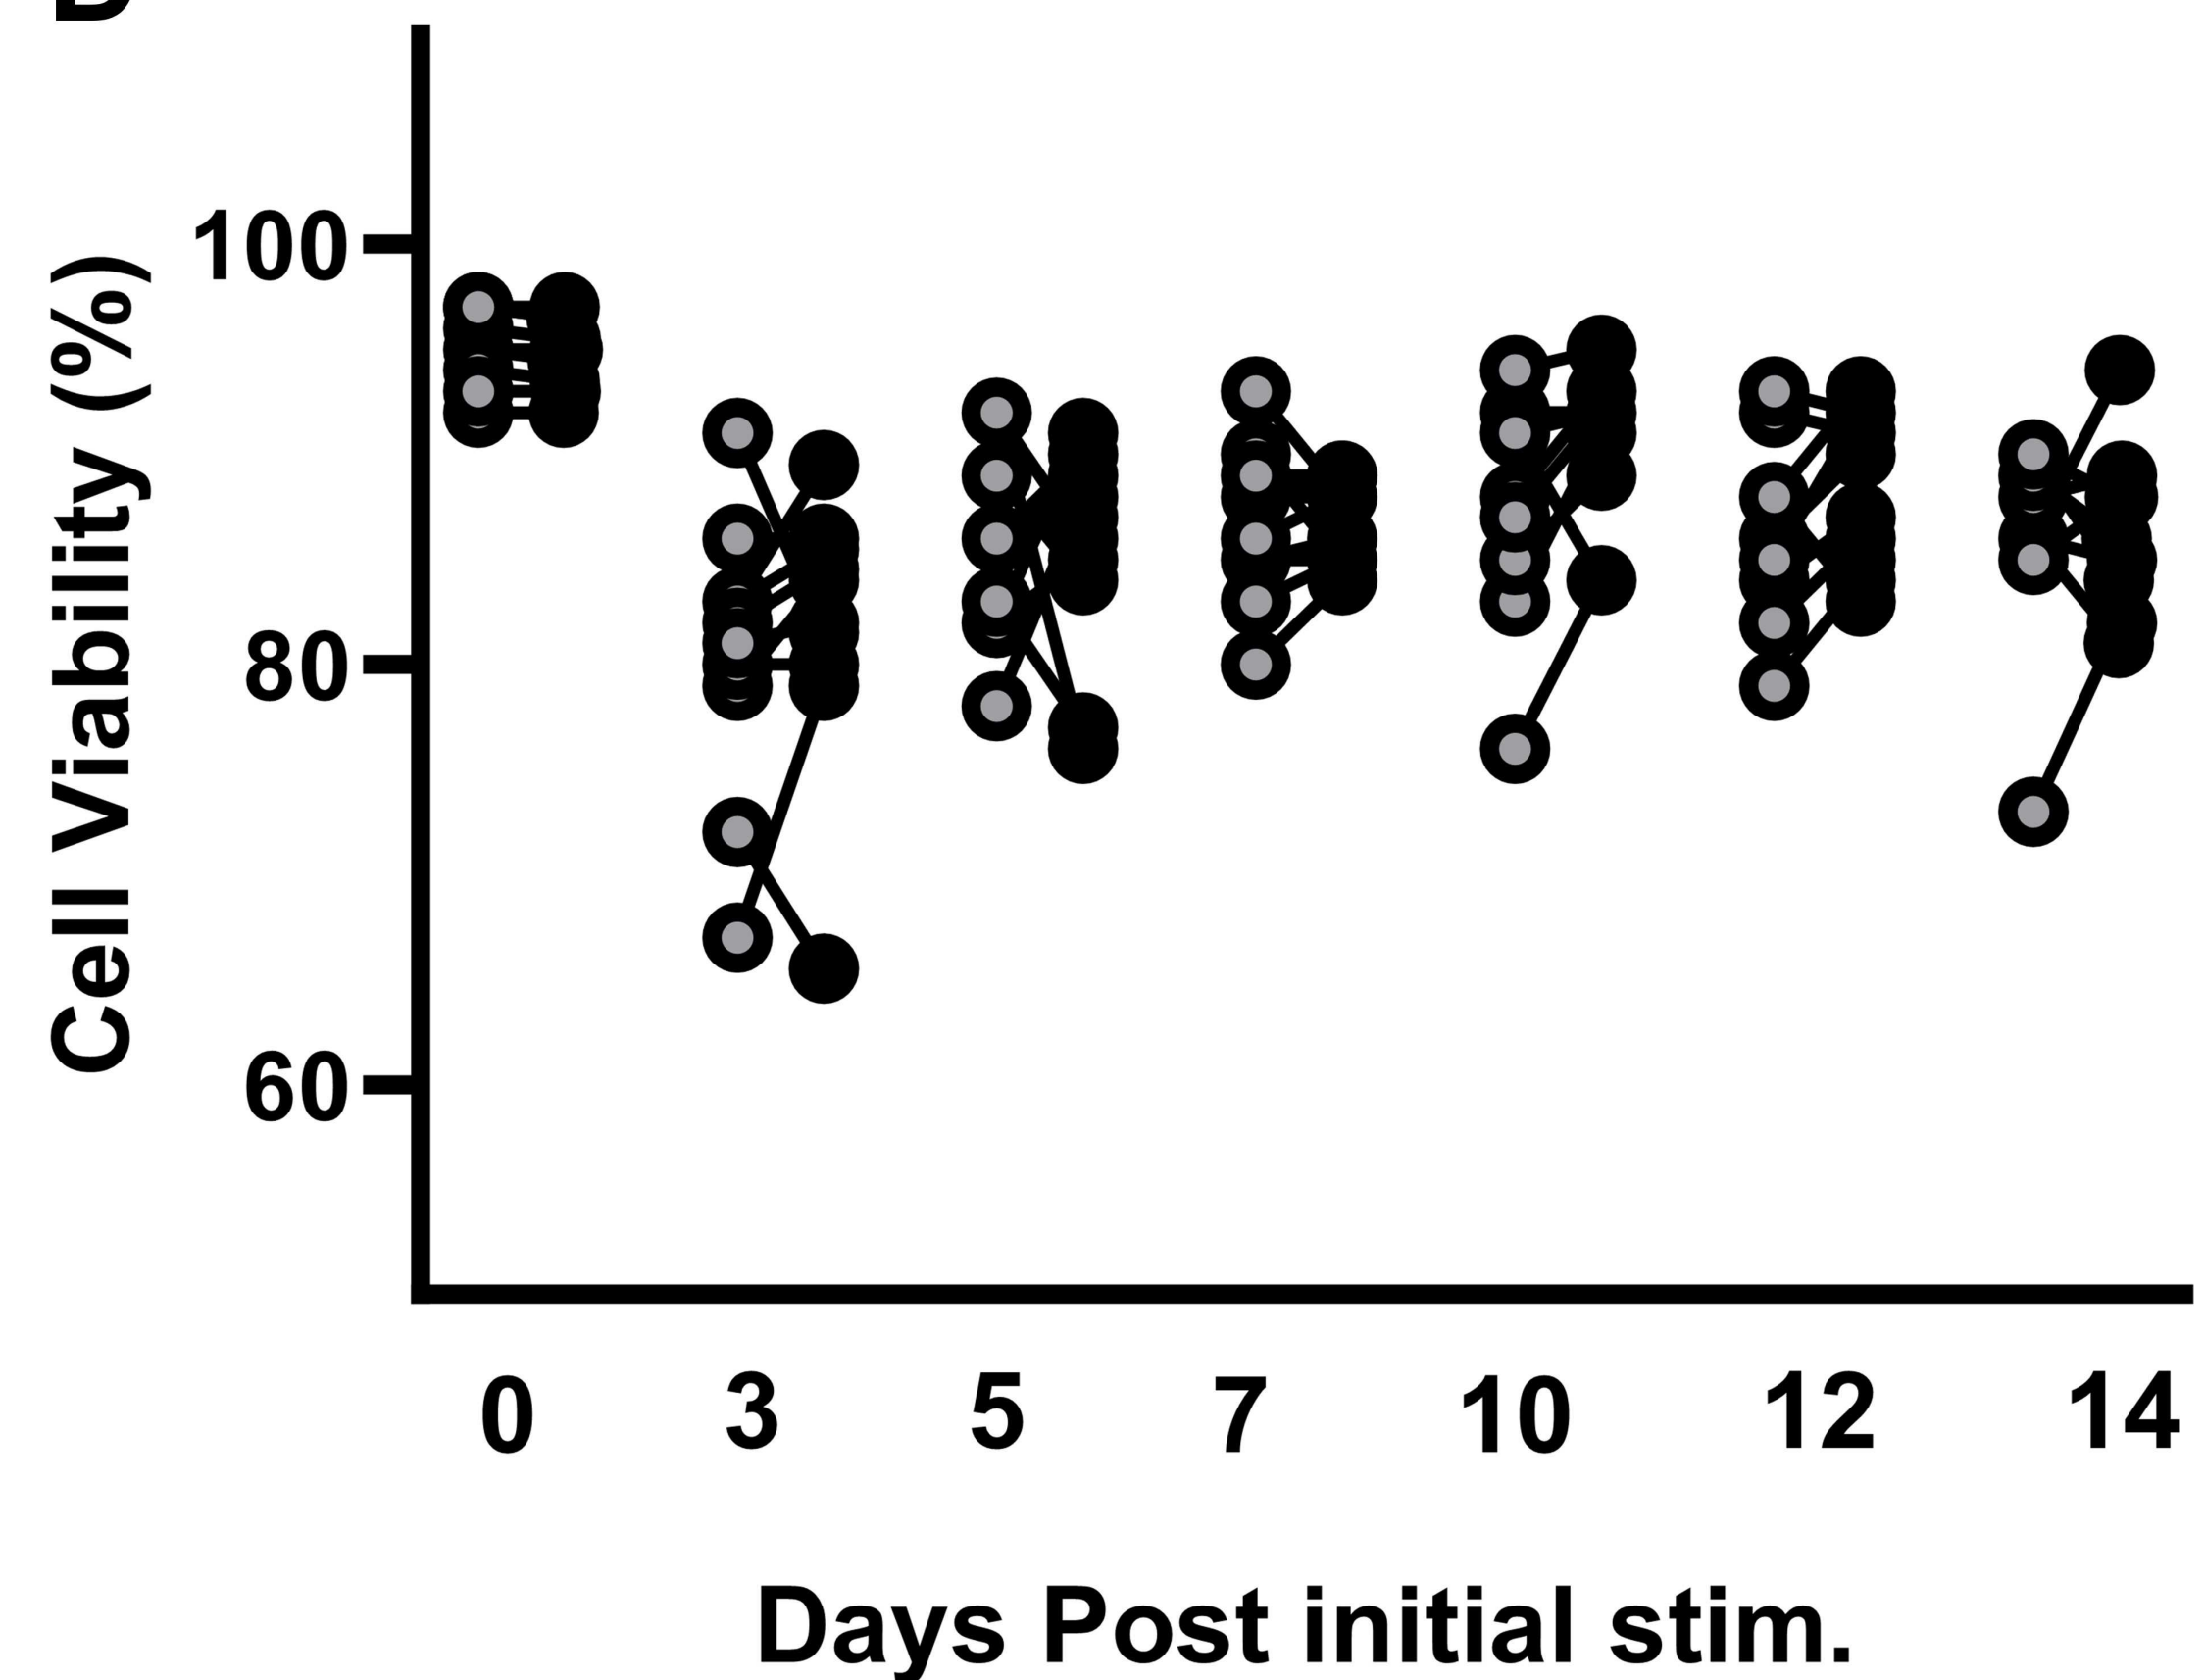

**Supp. Fig 2. Impact of mito-transfer on elderly T cell proliferation and viability.** Elderly CD4 T cells with or without mito-transfer were activated via surface cross-linking (CD3/CD28). CD4 T cells either received a single (single) or continuous (cont.) stimulation. **A)** Fold change and **B)** viability of CD4+ T cells with or without mito-transfer after single stimulation. **C)** Fold change and **D)** viability of CD4+ T cells with or without mito-transfer with continuous stimulation. 10 biological replicates per group, with  $p \leq 0.05 = *$ ,  $p \leq 0.01 = **$ , using paired Student's *t*-test.

○ Elderly CD4<sup>+</sup> T Cells (E-CD4<sup>+</sup> T Cells) ● Elderly CD4<sup>+</sup> T Cells + Mito-Transfer (EM-CD4<sup>+</sup> T Cells)

### Day 7 - Single & Continuous Stimulation

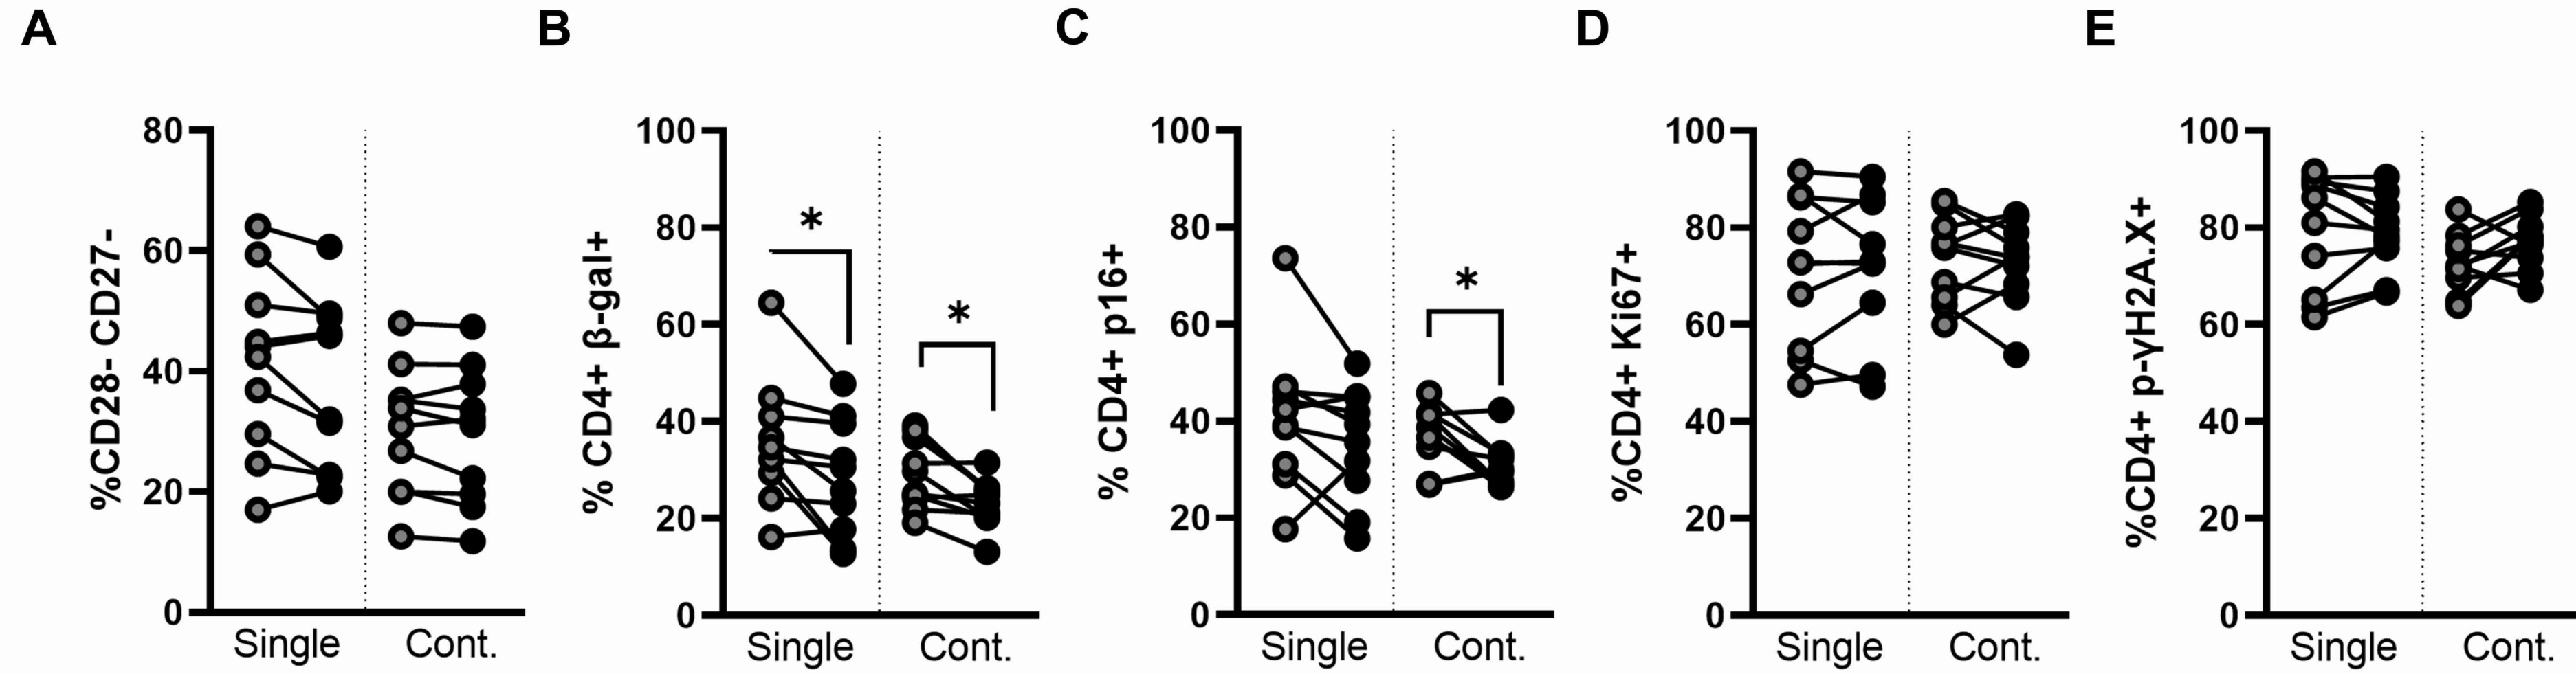

bioRxiv preprint doi: <https://doi.org/10.1101/2024.01.24.577036>; this version posted January 27, 2024. The copyright holder for this preprint (which was not certified by peer review) is the author/funder, who has granted bioRxiv a license to display the preprint in perpetuity. It is made available under aCC-BY-ND 4.0 International license.

### Day 14 - Continuous Stimulation

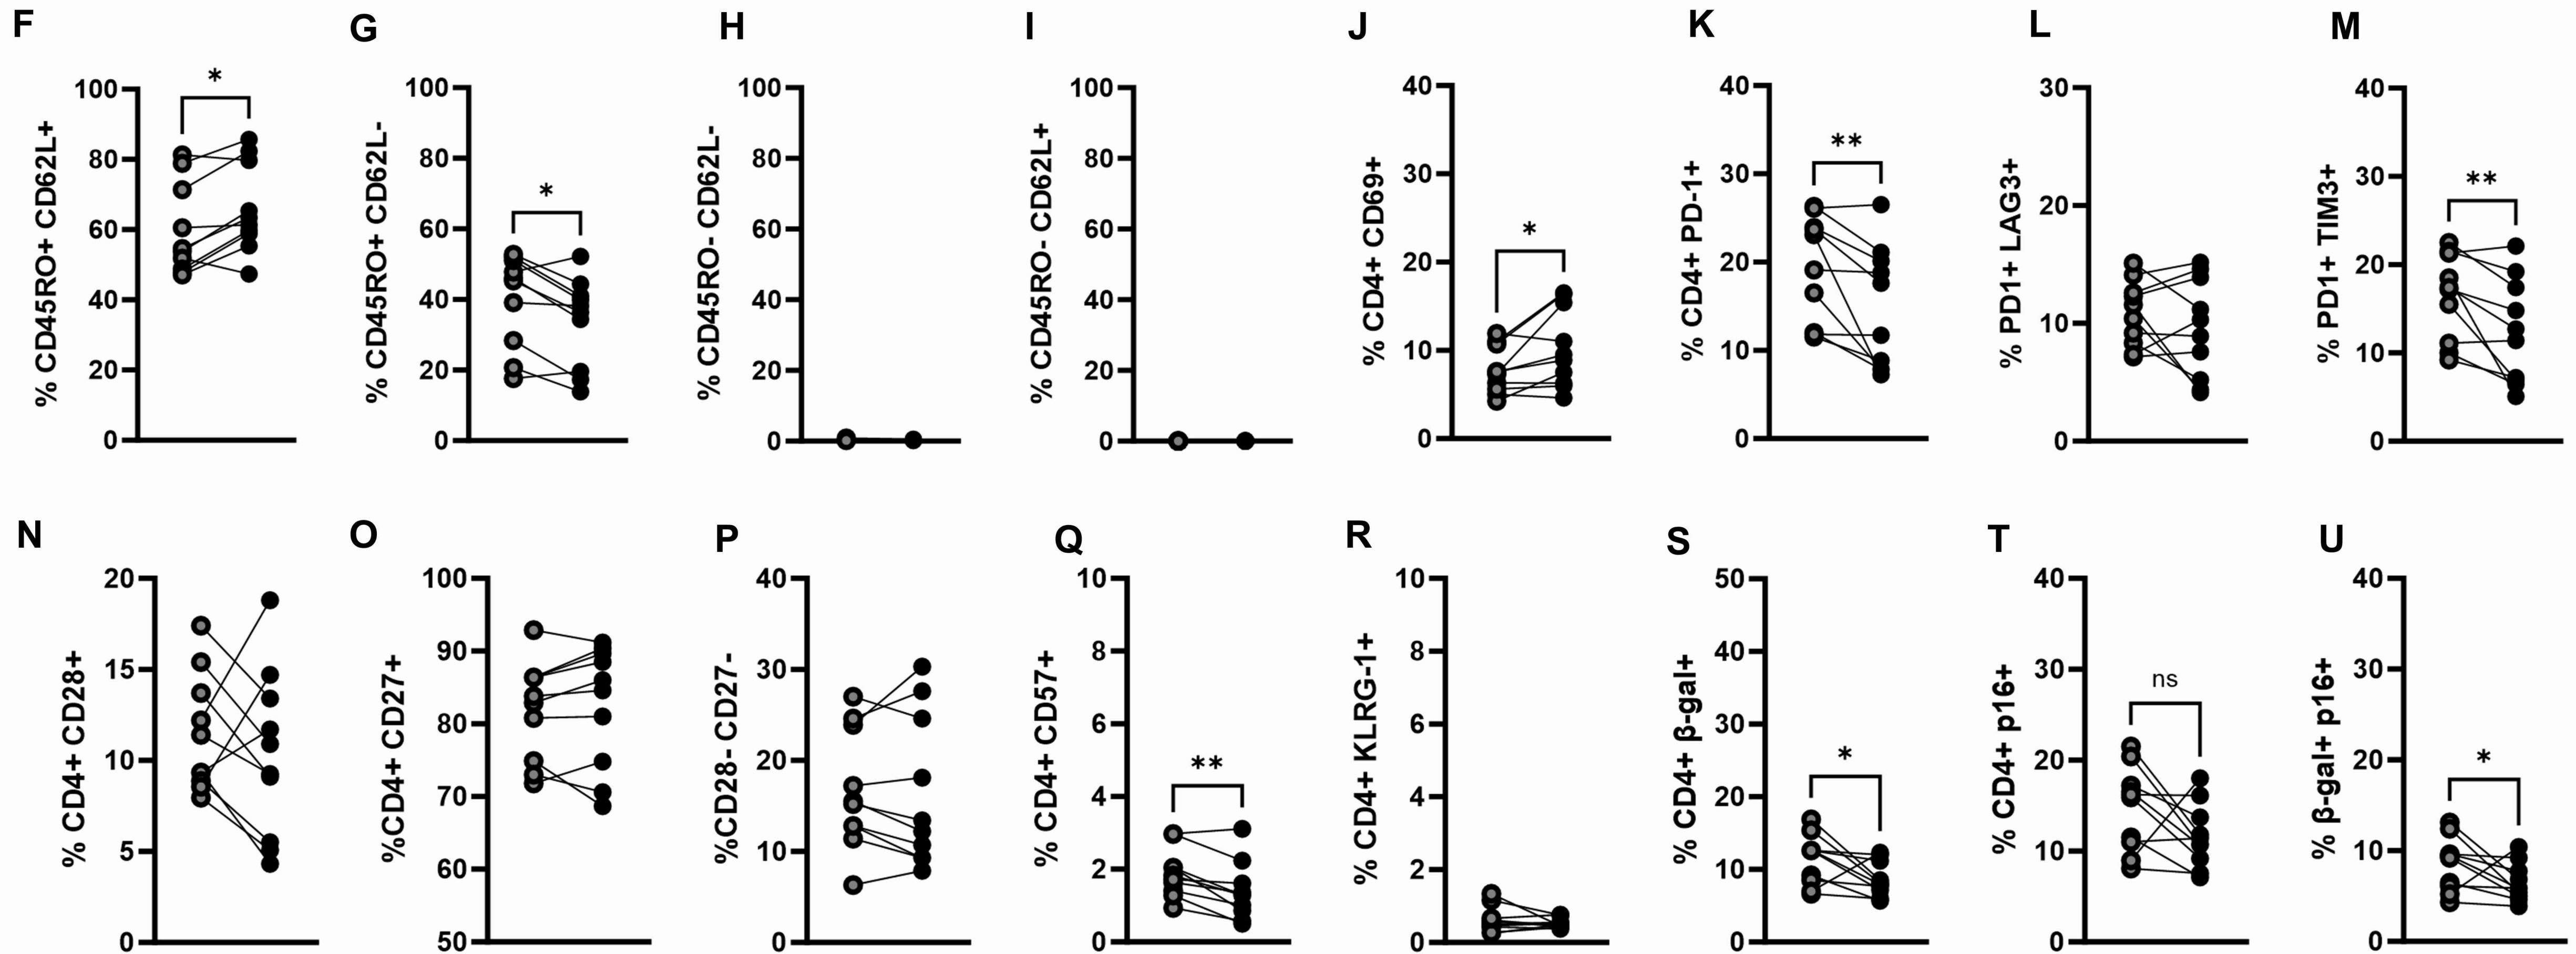

**Supp Fig 3. Mito-transfer improves T cell activation and reduces human T cell exhaustion and senescence.** Donor mitochondria isolated from primary human neonatal dermal fibroblasts were transplanted into CD4<sup>+</sup> T cells from elderly humans. Elderly CD4<sup>+</sup> T cells with or without mito-transfer were activated via surface cross-linking (CD3/CD28), T cells either received a single (single) or continuous (cont.) stimulation. The percentages of **A)** CD28- CD27, **B)**  $\beta$ -gal+, **C)** p16+, **D)** Ki67+, and **E)**  $\gamma$ H2A.X+ human CD4<sup>+</sup> cells at 7 days after initial activation with CD3/CD28/CD2. The percentages of **F)** CD45RO+ CD62L+, **G)** CD45RO+ CD62L, **H)** CD45RO- CD62L-, **I)** CD45RO- CD62L-, **J)** CD69+, **K)** PD-1+, **L)** PD-1+ LAG3+, **M)** PD-1+ TIM3+, **N)** CD28+, **O)** CD27+, **P)** CD28- CD27, **Q)** CD57+, **R)** KLRG1+, and **S)**  $\beta$ -Gal+, **T)** p16+, **U)**  $\beta$ -gal+ p16+ human CD4<sup>+</sup> T cells at 14 days after continuous stimulation with CD3/CD28/CD2. 10 biological replicates per group, with  $p \leq 0.05 = *$ ,  $p \leq 0.01 = **$ , using paired Student's t-test.
